# Supplementary material for: Deep ultraviolet transparent borophosphates LiAB2P2O9 (A = NH4, K) and LiNaB2P2O8(OH)2·H2O exhibiting a moderate second-harmonic generation response
Source: Royal Society of Chemistry journal article supplement (doi:10.1039/d4tc04947k), 2024-12-23
Supplement: d4tc04947k1.pdf [file d4tc04947k1.pdf]

## Supplementary Information

### **Deep ultraviolet transparent borophosphates $\text{LiAB}_2\text{P}_2\text{O}_9$ (A = $\text{NH}_4$ , K) and $\text{LiNaB}_2\text{P}_2\text{O}_8(\text{OH})_2 \cdot \text{H}_2\text{O}$ exhibiting a moderate second-harmonic generation response**

Huanhuan Zhao,<sup>a</sup> Chenxu Li,<sup>a, b</sup> Juanjuan Lu,<sup>a, b</sup> Zihua Yang,<sup>a, b</sup> Jian Han,<sup>\*, a, b</sup> and Shilie Pan<sup>\*, a, b</sup>

<sup>a</sup> Research Center for Crystal Materials; State Key Laboratory of Functional Materials and Devices for Special Environmental Conditions; Xinjiang Key Laboratory of Functional Crystal Materials; Xinjiang Technical Institute of Physics and Chemistry, CAS, 40-1 South Beijing Road, Urumqi 830011, China

<sup>b</sup> Center of Materials Science and Optoelectronics Engineering, University of Chinese Academy of Sciences, Beijing 100049, China

\* Corresponding authors: hanjian@ms.xjb.ac.cn (J. Han); slpan@ms.xjb.ac.cn (S. Pan)

## Experimental section

### Crystal growth and solid states synthesis

Single crystals of  $\text{LiAB}_2\text{P}_2\text{O}_9$  ( $A = \text{NH}_4, \text{K}$ ) and  $\text{LiNaB}_2\text{P}_2\text{O}_8(\text{OH})_2 \cdot \text{H}_2\text{O}$  were grown by the solid-state reaction in a closed system. The initial reagents of  $\text{LiCl}$ ,  $\text{H}_3\text{BO}_3$ ,  $\text{NH}_4\text{H}_2\text{PO}_4/\text{KH}_2\text{PO}_4$  (KDP)/ $\text{NaH}_2\text{PO}_4$  were blended thoroughly in an agate mortar with a molar ratio of 14: 3: 8, 1: 2: 2, 1: 2: 2, respectively. The above raw materials were respectively encapsulated in a 23 mL hydrothermal kettle with polytetrafluoroethylene lining and put into a drying oven with programmed temperature control. The temperature was brought up to 220 °C in 120 min and maintained for 72 h, cooling to 190 °C in 1800 min, 150 °C in 1600 min, 120 °C in 700 min, and 90 °C in 510 min, and it was cooled to room temperature after 480 min.

The  $\text{LiAB}_2\text{P}_2\text{O}_9$  ( $A = \text{NH}_4, \text{K}$ ) polycrystalline powders were synthesized by solid-state reaction technique in a closed system. By the temperature of the crystal growth,  $\text{LiCl}$ ,  $\text{H}_3\text{BO}_3$ , and  $\text{NH}_4\text{H}_2\text{PO}_4/\text{KH}_2\text{PO}_4$  are thoroughly ground and mixed in stoichiometric ratios. However, we made multiple attempts, but were only able to obtain the crystal for the structure of  $\text{LiNaB}_2\text{P}_2\text{O}_8(\text{OH})_2 \cdot \text{H}_2\text{O}$  rather than the pure polycrystalline powder sample.

### Structure determination

Single-crystal XRD data of the title compounds were collected on a Bruker D8 Venture diffractometer with  $\text{Mo K}\alpha$  radiation ( $\lambda = 0.71073 \text{ \AA}$ ) at 293.15 K. Data absorption correction of the data was completed by SAINT-Plus software.<sup>1</sup> The structure of the title crystal was solved with programs from the SHELXTL crystallographic software package with the Olex2 software.<sup>2</sup> The symmetry of the structures was checked by the PLATON program, and no higher symmetry was found.<sup>3</sup> The crystal data and structure refinement information for  $\text{LiAB}_2\text{P}_2\text{O}_9$  ( $A = \text{NH}_4, \text{K}$ ) and  $\text{LiNaB}_2\text{P}_2\text{O}_8(\text{OH})_2 \cdot \text{H}_2\text{O}$  are listed in Table S1. The equivalent isotropic displacement parameters and atomic coordinates of the three compounds are summarized in Table S2, and Table S3 contains a list of the selected bond lengths and angles.

### Powder X-ray diffraction.

The powder X-ray diffraction (XRD) patterns of  $\text{LiAB}_2\text{P}_2\text{O}_9$  ( $A = \text{NH}_4, \text{K}$ ) were measured using a Bruker D2 PHASER X-ray diffractometer equipped with  $\text{Cu K}\alpha$  radiation ( $\lambda = 1.5418 \text{ \AA}$ ). The scanning range of  $2\theta$  was set from 5 to 70° with a fixed counting time of 1 s/step and a scan step width of 0.02°, respectively.

### Infrared and UV–Vis–NIR diffuse reflectance spectra

The Shimadzu IR Affinity-1 Fourier transform infrared spectrometer was utilized to measure the infrared spectra within the 4000-400  $\text{cm}^{-1}$  range. The samples and dried KBr were thoroughly mixed. At room temperature, the Shimadzu SolidSpec-3700DUV spectrophotometer was used to measure the diffuse reflectance spectra, and the data were recorded in the wavelength range of 200-2600 nm.

### **Thermal analysis**

Thermogravimetric-differential scanning calorimetry (TG-DSC) analysis was employed to measure the thermodynamic properties of  $\text{LiAB}_2\text{P}_2\text{O}_9$  ( $A = \text{NH}_4, \text{K}$ ) by a simultaneous thermal analyzer (NETZSCH STA 449 F3) under a flowing  $\text{N}_2$  atmosphere. The samples ( $\text{LiNH}_4\text{B}_2\text{P}_2\text{O}_9$ : 4.03 mg,  $\text{LiKB}_2\text{P}_2\text{O}_9$ : 6.49 mg) were placed in the Pt crucibles from 40-800  $^\circ\text{C}$ , and the heating and cooling rates were 5  $^\circ\text{C}/\text{min}$ .

### **Powder second harmonic generation (SHG) measurements**

Powder SHG tests were measured by a modified Kurtz–Perry method using a Q-switched Nd: YVO<sub>4</sub> solid-state laser at 1064 nm and 532 nm for visible and ultraviolet SHG, respectively. Polycrystalline  $\text{LiAB}_2\text{P}_2\text{O}_9$  ( $A = \text{NH}_4, \text{K}$ ) samples were ground and sieved into the following particle size ranges: 20-38, 38-55, 55-88, 88-105, 105-150 and 150-200  $\mu\text{m}$ . The sieved KDP samples were used as references. The samples were pressed between two glass slides and secured in 1 mm thick aluminum holders with an 8 mm diameter hole. Then the samples were irradiated with a pulsed laser, and the second harmonic output was separated by a narrowband pass filter ( $530 \pm 10$  nm) and detected by a photomultiplier tube attached to an oscilloscope. No index-matching fluid was used in any of the experiments.

### **Birefringence measurements**

A block single crystal with a thickness determined on a single-crystal XRD diffractometer was chosen to test birefringence with a cross-polarizing microscope (NIKON Eclipse Ci-POL) equipped with a quartz wedge compensator under a 546 nm light source. The birefringence was determined using the formula  $R$  (retardation) =  $|N_g - N_p| \times d = \Delta n \times d$ , where  $N_g$ ,  $N_p$ , and  $\Delta n$  denote the refractive indices of fast light, slow light, and the birefringence, respectively.  $R$  represents the optical path difference, while  $d$  signifies the thickness of the crystal.

### **Theoretical calculations**

The electronic structures as well as linear optical property calculations were performed by employing CASTEP, a plane-wave pseudopotential density functional theory (DFT) package, with the norm-conserving pseudopotentials (NCPs).<sup>4, 5</sup> The

related calculations are performed by Perdew–Burke–Ernzerhof (PBE) functional under the generalized gradient approximation (GGA).<sup>6</sup> The plane-wave energy cutoff was set at 750 eV. Self-consistent field (SCF) calculations were performed with a convergence criterion of  $5 \times 10^{-7}$  eV/atom on the total energy. Using the Monkhorst-Pack method, the  $k$  point sampling was finally set as  $4 \times 3 \times 2$ . The nonlocal exchange functional Heyd-Scuseria-Ernzerhof (HSE06) was adopted to calculate bandgaps. The band gap differences between the GGA-PBE and HSE06 methods were utilized as scissor operators to enhance the accuracy of calculations for birefringence and SHG coefficients.<sup>7</sup>

$$E_{xc}^{HSE} = aE_x^{HF,SR}(w) + (1 - a)E_x^{PBE,SR}(w) + E_x^{PBE,LR}(w) + E_c^{PBE}(w)$$

The valence electrons of the elements in title compounds were calculated as follows: Li ( $2s^1$ ), N ( $2s^22p^3$ ), K ( $3s^23p^64s^1$ ), Na ( $2s^22p^63s^1$ ), B ( $2s^22p^1$ ), P ( $3s^23p^3$ ), O ( $2s^22p^4$ ), respectively.

**Table S1.** Crystal data and structure refinement for LiNH<sub>4</sub>B<sub>2</sub>P<sub>2</sub>O<sub>9</sub>, LiKB<sub>2</sub>P<sub>2</sub>O<sub>9</sub> and LiNaB<sub>2</sub>P<sub>2</sub>O<sub>8</sub>(OH)<sub>2</sub>·H<sub>2</sub>O.

| Empirical formula                                            | LiNH <sub>4</sub> B <sub>2</sub> P <sub>2</sub> O <sub>9</sub>     | LiKB <sub>2</sub> P <sub>2</sub> O <sub>9</sub>                    | LiNaB <sub>2</sub> P <sub>2</sub> O <sub>8</sub> (OH) <sub>2</sub> ·H <sub>2</sub> O |
|--------------------------------------------------------------|--------------------------------------------------------------------|--------------------------------------------------------------------|--------------------------------------------------------------------------------------|
| Formula weight                                               | 252.54                                                             | 273.6                                                              | 293.52                                                                               |
| Temperature (K)                                              | 293                                                                | 293                                                                | 293                                                                                  |
| Crystal system                                               | orthorhombic                                                       | orthorhombic                                                       | monoclinic                                                                           |
| Space group                                                  | <i>P</i> 2 <sub>1</sub> 2 <sub>1</sub> 2 <sub>1</sub>              | <i>P</i> 2 <sub>1</sub> 2 <sub>1</sub> 2 <sub>1</sub>              | <i>C</i> 2                                                                           |
| <i>a</i> (Å)                                                 | 7.1922(5)                                                          | 7.1528(5)                                                          | 12.5422(12)                                                                          |
| <i>b</i> (Å)                                                 | 7.3988(5)                                                          | 7.3764(7)                                                          | 7.9359(8)                                                                            |
| <i>c</i> (Å)                                                 | 12.7559(9)                                                         | 12.6353(13)                                                        | 4.2826(4)                                                                            |
| $\beta$ (°)                                                  | 90                                                                 | 90                                                                 | 107.839(4)                                                                           |
| Volume (Å <sup>3</sup> )                                     | 678.79(8)                                                          | 666.66(10)                                                         | 405.77(7)                                                                            |
| <i>Z</i>                                                     | 4                                                                  | 4                                                                  | 2                                                                                    |
| $\rho_{\text{calc}}$ (g/cm <sup>3</sup> )                    | 2.471                                                              | 2.726                                                              | 2.402                                                                                |
| $\mu$ (mm <sup>-1</sup> )                                    | 0.678                                                              | 1.307                                                              | 0.646                                                                                |
| <i>F</i> (000)                                               | 504                                                                | 536                                                                | 292                                                                                  |
| 2 $\theta$ range for data collection (°)                     | 6.366 to 54.964                                                    | 6.396 to 55.022                                                    | 6.164 to 54.928                                                                      |
|                                                              | -9 ≤ <i>h</i> ≤ 9,                                                 | -9 ≤ <i>h</i> ≤ 8,                                                 | -16 ≤ <i>h</i> ≤ 16,                                                                 |
| Index ranges                                                 | -9 ≤ <i>k</i> ≤ 9,                                                 | -9 ≤ <i>k</i> ≤ 9,                                                 | -10 ≤ <i>k</i> ≤ 9,                                                                  |
|                                                              | -15 ≤ <i>l</i> ≤ 16                                                | -16 ≤ <i>l</i> ≤ 16                                                | -5 ≤ <i>l</i> ≤ 5                                                                    |
| Reflections collected                                        | 5431                                                               | 5434                                                               | 3000                                                                                 |
| Independent reflections                                      | 1554 [ <i>R</i> <sub>int</sub> = 0.0596]                           | 1531 [ <i>R</i> <sub>int</sub> = 0.0747]                           | 874 [ <i>R</i> <sub>int</sub> = 0.0655]                                              |
| Completeness (%)                                             | 99.60                                                              | 99.70                                                              | 97.70                                                                                |
| Data/restraints/parameters                                   | 1554/3/153                                                         | 1531/0/136                                                         | 874/3/88                                                                             |
| Goodness-of-fit on <i>F</i> <sup>2</sup>                     | 1.11                                                               | 1.061                                                              | 1.101                                                                                |
| Final <i>R</i> indexes [ <i>I</i> ≥ 2 $\sigma$ ( <i>I</i> )] | <i>R</i> <sub>1</sub> = 0.0363,<br><i>wR</i> <sub>2</sub> = 0.0806 | <i>R</i> <sub>1</sub> = 0.0414,<br><i>wR</i> <sub>2</sub> = 0.0952 | <i>R</i> <sub>1</sub> = 0.0336,<br><i>wR</i> <sub>2</sub> = 0.0669                   |
| Final <i>R</i> indexes [all data]                            | <i>R</i> <sub>1</sub> = 0.0406,<br><i>wR</i> <sub>2</sub> = 0.0829 | <i>R</i> <sub>1</sub> = 0.0445,<br><i>wR</i> <sub>2</sub> = 0.0993 | <i>R</i> <sub>1</sub> = 0.0364,<br><i>wR</i> <sub>2</sub> = 0.0701                   |
| Largest diff. peak (hole) e Å <sup>-3</sup>                  | 0.49/-0.51                                                         | 0.49/-0.65                                                         | 0.30/-0.37                                                                           |
| Flack parameter                                              | -0.09(10)                                                          | -0.01(6)                                                           | -0.06(12)                                                                            |

**Table S2.** Fractional atomic coordinates ( $\times 10^4$ ) and equivalent isotropic displacement parameters ( $\text{\AA}^2 \times 10^3$ ) for  $\text{LiNH}_4\text{B}_2\text{P}_2\text{O}_9$ ,  $\text{LiKB}_2\text{P}_2\text{O}_9$  and  $\text{LiNaB}_2\text{P}_2\text{O}_8(\text{OH})_2 \cdot \text{H}_2\text{O}$ .  $U_{\text{eq}}$  is defined as 1/3 of the trace of the orthogonalised  $U_{ij}$  tensor.

| Atom                                          | Wyck. | $x$        | $y$        | $z$        | $U(\text{eq})$ | BVS  |
|-----------------------------------------------|-------|------------|------------|------------|----------------|------|
| $\text{LiNH}_4\text{B}_2\text{P}_2\text{O}_9$ |       |            |            |            |                |      |
| Li1                                           | 4a    | 8917(13)   | 3949(11)   | 2606(7)    | 22.0(18)       | 0.98 |
| B1                                            | 4a    | 2636(7)    | 5444(7)    | 2479(4)    | 9.8(10)        | 3.05 |
| B2                                            | 4a    | 2345(7)    | 3469(7)    | 4028(4)    | 8.7(10)        | 3.05 |
| P1                                            | 4a    | 6011.2(17) | 7114.8(17) | 2664.2(9)  | 12.0(3)        | 5.25 |
| P2                                            | 4a    | 4629.8(16) | 4173.0(16) | 5772.6(9)  | 9.5(3)         | 5.18 |
| O1                                            | 4a    | 3954(4)    | 6768(4)    | 2921(2)    | 11.7(7)        | 2.04 |
| O2                                            | 4a    | 1483(4)    | 6552(4)    | 1739(2)    | 11.4(7)        | 2.15 |
| O3                                            | 4a    | 3641(4)    | 4029(4)    | 1873(2)    | 12.0(7)        | 1.95 |
| O4                                            | 4a    | 1499(4)    | 4649(4)    | 3272(2)    | 9.5(7)         | 1.89 |
| O5                                            | 4a    | 906(5)     | 2394(4)    | 4570(2)    | 12.0(7)        | 2.02 |
| O6                                            | 4a    | 3742(4)    | 2265(5)    | 3536(2)    | 12.1(7)        | 2.00 |
| O7                                            | 4a    | 3286(4)    | 4555(4)    | 4860(2)    | 10.5(7)        | 2.00 |
| O8                                            | 4a    | 5635(4)    | 5860(5)    | 6082(3)    | 14.2(7)        | 2.00 |
| O9                                            | 4a    | 7237(5)    | 5720(5)    | 3135(3)    | 19.7(8)        | 2.01 |
| $\text{LiKB}_2\text{P}_2\text{O}_9$           |       |            |            |            |                |      |
| Li1                                           | 4a    | 8862(13)   | 3933(14)   | 2581(8)    | 19(2)          | 0.97 |
| K1                                            | 4a    | 9171.3(16) | 6073.3(18) | 5030.3(11) | 21.4(3)        | 1.16 |
| B1                                            | 4a    | 2612(7)    | 5417(7)    | 2462(5)    | 8.7(12)        | 3.03 |
| B2                                            | 4a    | 2340(7)    | 3447(7)    | 4027(5)    | 8.1(11)        | 3.05 |
| P1                                            | 4a    | 6018.5(18) | 7069.3(19) | 2682.0(12) | 11.0(3)        | 5.24 |
| P2                                            | 4a    | -339.1(16) | 792.4(18)  | 4254.8(11) | 8.6(3)         | 5.20 |
| O1                                            | 4a    | 7242(5)    | 5693(6)    | 3185(3)    | 18.7(9)        | 2.00 |
| O2                                            | 4a    | 3948(5)    | 6748(5)    | 2919(3)    | 10.6(8)        | 2.16 |
| O3                                            | 4a    | 3650(5)    | 4008(5)    | 1853(3)    | 13.2(8)        | 2.10 |
| O4                                            | 4a    | 1454(5)    | 6515(5)    | 1722(3)    | 10.5(8)        | 2.16 |
| O5                                            | 4a    | 1462(4)    | 4604(5)    | 3260(3)    | 8.9(7)         | 1.96 |
| O6                                            | 4a    | 3293(4)    | 4589(4)    | 4833(3)    | 9.5(7)         | 2.12 |
| O7                                            | 4a    | 3714(5)    | 2209(5)    | 3532(3)    | 11.5(8)        | 2.07 |
| O8                                            | 4a    | 897(5)     | 2393(5)    | 4601(3)    | 10.5(8)        | 2.11 |

|                                                                                      |    |           |            |           |          |      |
|--------------------------------------------------------------------------------------|----|-----------|------------|-----------|----------|------|
| O9                                                                                   | 4a | 704(5)    | -892(5)    | 3968(3)   | 13.2(8)  | 2.01 |
| LiNaB <sub>2</sub> P <sub>2</sub> O <sub>8</sub> (OH) <sub>2</sub> ·H <sub>2</sub> O |    |           |            |           |          |      |
| Li1                                                                                  | 2b | 5000      | 7568(14)   | 5000      | 16(2)    | 1.12 |
| Na1                                                                                  | 2a | 5000      | 3974(4)    | 10000     | 39.0(9)  | 0.88 |
| B1                                                                                   | 4c | 2157(4)   | 4021(6)    | -1505(11) | 11.2(9)  | 3.05 |
| P1                                                                                   | 4c | 2816.8(8) | 5937.4(13) | 4112(2)   | 9.1(3)   | 5.21 |
| O1                                                                                   | 4c | 1066(3)   | 3647(4)    | -1310(8)  | 13.7(7)  | 1.98 |
| O2                                                                                   | 4c | 1965(2)   | 5271(4)    | -4229(7)  | 12.0(6)  | 1.97 |
| O3                                                                                   | 4c | 2763(2)   | 2538(4)    | -2324(7)  | 12.0(6)  | 2.01 |
| O4                                                                                   | 4c | 2950(2)   | 4658(4)    | 1543(6)   | 12.1(7)  | 2.09 |
| O5                                                                                   | 4c | 3946(2)   | 6261(4)    | 6522(7)   | 13.8(7)  | 1.88 |
| O6                                                                                   | 2b | 5000      | 2437(7)    | 5000      | 31.2(12) | 1.86 |

**Table S3.** Bond lengths and angles for  $\text{LiNH}_4\text{B}_2\text{P}_2\text{O}_9$ ,  $\text{LiKB}_2\text{P}_2\text{O}_9$  and  $\text{LiNaB}_2\text{P}_2\text{O}_8(\text{OH})_2 \cdot \text{H}_2\text{O}$ .

| $\text{LiNH}_4\text{B}_2\text{P}_2\text{O}_9$               |                        |                                             |            |
|-------------------------------------------------------------|------------------------|---------------------------------------------|------------|
| Li(1)-O(2) <sup>#1</sup>                                    | 1.982(9)               | B(2)-O(6)                                   | 1.482(6)   |
| Li(1)-O(4) <sup>#3</sup>                                    | 2.107(10)              | B(2)-O(7)                                   | 1.494(6)   |
| Li(1)-O(8) <sup>#2</sup>                                    | 1.975(9)               | P(1)-O(1)                                   | 1.537(3)   |
| Li(1)-O(9)                                                  | 1.906(9)               | P(1)-O(3) <sup>#4</sup>                     | 1.555(3)   |
| B(1)-O(1)                                                   | 1.475(6)               | P(1)-O(6) <sup>#4</sup>                     | 1.546(3)   |
| B(1)-O(2)                                                   | 1.500(6)               | P(1)-O(9)                                   | 1.484(4)   |
| B(1)-O(3)                                                   | 1.488(6)               | P(2)-O(2) <sup>#6</sup>                     | 1.565(3)   |
| B(1)-O(4)                                                   | 1.427(6)               | P(2)-O(5) <sup>#7</sup>                     | 1.542(3)   |
| B(2)-O(4)                                                   | 1.436(6)               | P(2)-O(7)                                   | 1.539(3)   |
| B(2)-O(5)                                                   | 1.477(6)               | P(2)-O(8)                                   | 1.495(3)   |
| O(2) <sup>#1</sup> -Li(1)-O(4) <sup>#3</sup>                | 100.2(4)               | O(5)-B(2)-O(6)                              | 110.5(4)   |
| O(8) <sup>#2</sup> -Li(1)-O(2) <sup>#1</sup>                | 120.2(5)               | O(5)-B(2)-O(7)                              | 105.9(4)   |
| O(8) <sup>#2</sup> -Li(1)-O(4) <sup>#3</sup>                | 103.6(4)               | O(6)-B(2)-O(7)                              | 108.5(4)   |
| O(9)-Li(1)-O(2) <sup>#1</sup>                               | 111.9(4)               | O(1)-P(1)-O(3) <sup>#4</sup>                | 103.09(18) |
| O(9)-Li(1)-O(4) <sup>#3</sup>                               | 104.3(4)               | O(1)-P(1)-O(6) <sup>#4</sup>                | 109.49(18) |
| O(9)-Li(1)-O(8) <sup>#2</sup>                               | 113.7(5)               | O(6) <sup>#4</sup> -P(1)-O(3) <sup>#4</sup> | 106.97(19) |
| O(1)-B(1)-O(2)                                              | 103.4(4)               | O(9)-P(1)-O(1)                              | 111.7(2)   |
| O(1)-B(1)-O(3)                                              | 110.7(4)               | O(9)-P(1)-O(3) <sup>#4</sup>                | 112.6(2)   |
| O(3)-B(1)-O(2)                                              | 109.0(4)               | O(9)-P(1)-O(6) <sup>#4</sup>                | 112.5(2)   |
| O(4)-B(1)-O(1)                                              | 111.8(4)               | O(5) <sup>#7</sup> -P(2)-O(2) <sup>#6</sup> | 105.68(18) |
| O(4)-B(1)-O(2)                                              | 110.8(4)               | O(7)-P(2)-O(2) <sup>#6</sup>                | 109.71(18) |
| O(4)-B(1)-O(3)                                              | 110.9(4)               | O(7)-P(2)-O(5) <sup>#7</sup>                | 107.30(18) |
| O(4)-B(2)-O(5)                                              | 110.2(4)               | O(8)-P(2)-O(2) <sup>#6</sup>                | 109.02(18) |
| O(4)-B(2)-O(6)                                              | 111.6(4)               | O(8)-P(2)-O(5) <sup>#7</sup>                | 114.50(19) |
| O(4)-B(2)-O(7)                                              | 110.0(4)               | O(8)-P(2)-O(7)                              | 110.48(19) |
| Symmetry transformations used to generate equivalent atoms: |                        |                                             |            |
| #1 -x+1, y-1/2, -z+1/2                                      | #2 -x+3/2, -y+1, z-1/2 | #3 x+1, y, z                                |            |
| #4 -x+1, y+1/2, -z+1/2                                      | #5 -x+3/2, -y+1, z+1/2 | #6 -x+1/2, -y+1, z+1/2                      |            |
| #7 x+1/2, -y+1/2, -z+1                                      | #8 -x+1/2, -y+1, z-1/2 | #9 x-1, y, z                                |            |
| #10 x-1/2, -y+1/2, -z+1                                     |                        |                                             |            |
| $\text{LiKB}_2\text{P}_2\text{O}_9$                         |                        |                                             |            |
| Li(1)-O(1)                                                  | 1.900(11)              | B(1)-O(4)                                   | 1.489(6)   |



---

|                                              |            |                                             |            |
|----------------------------------------------|------------|---------------------------------------------|------------|
| Li(1)-O(4) <sup>#3</sup>                     | 2.002(11)  | B(1)-O(5)                                   | 1.433(6)   |
| Li(1)-O(5) <sup>#5</sup>                     | 2.107(11)  | B(2)-O(5)                                   | 1.436(7)   |
| Li(1)-O(9) <sup>#4</sup>                     | 1.986(11)  | B(2)-O(6)                                   | 1.487(6)   |
| K(1)-O(1)                                    | 2.724(4)   | B(2)-O(7)                                   | 1.480(6)   |
| K(1)-O(2) <sup>#6</sup>                      | 3.053(4)   | B(2)-O(8)                                   | 1.483(6)   |
| K(1)-O(3) <sup>#7</sup>                      | 2.781(4)   | P(1)-O(1)                                   | 1.483(4)   |
| K(1)-O(5) <sup>#5</sup>                      | 2.977(4)   | P(1)-O(2)                                   | 1.530(4)   |
| K(1)-O(6) <sup>#6</sup>                      | 3.266(4)   | P(1)-O(3) <sup>#4</sup>                     | 1.564(4)   |
| K(1)-O(6) <sup>#5</sup>                      | 3.155(3)   | P(1)-O(7) <sup>#4</sup>                     | 1.549(4)   |
| K(1)-O(7) <sup>#8</sup>                      | 3.044(4)   | P(2)-O(4) <sup>#14</sup>                    | 1.563(4)   |
| K(1)-O(8) <sup>#5</sup>                      | 3.031(4)   | P(2)-O(6) <sup>#13</sup>                    | 1.538(4)   |
| K(1)-O(9) <sup>#8</sup>                      | 2.788(4)   | P(2)-O(8)                                   | 1.538(4)   |
| K(1)-O(9) <sup>#9</sup>                      | 2.831(4)   | P(2)-O(9)                                   | 1.494(4)   |
| B(1)-O(2)                                    | 1.487(6)   | O(8) <sup>#5</sup> -K(1)-O(6) <sup>#5</sup> | 45.12(9)   |
| O(1)-Li(1)-O(2) <sup>#3</sup>                | 92.8(4)    | O(8) <sup>#5</sup> -K(1)-O(6) <sup>#6</sup> | 164.89(10) |
| O(1)-Li(1)-O(4) <sup>#3</sup>                | 111.3(5)   | O(8) <sup>#5</sup> -K(1)-O(7) <sup>#8</sup> | 55.82(10)  |
| O(1)-Li(1)-O(5) <sup>#5</sup>                | 102.4(5)   | O(9) <sup>#8</sup> -K(1)-O(2) <sup>#6</sup> | 66.01(10)  |
| O(1)-Li(1)-O(9) <sup>#4</sup>                | 116.6(5)   | O(9) <sup>#9</sup> -K(1)-O(2) <sup>#6</sup> | 90.36(11)  |
| O(4) <sup>#3</sup> -Li(1)-O(2) <sup>#3</sup> | 58.5(3)    | O(9) <sup>#8</sup> -K(1)-O(5) <sup>#5</sup> | 144.42(11) |
| O(4) <sup>#3</sup> -Li(1)-O(5) <sup>#5</sup> | 97.4(4)    | O(9) <sup>#9</sup> -K(1)-O(5) <sup>#5</sup> | 73.66(11)  |
| O(5) <sup>#5</sup> -Li(1)-O(2) <sup>#3</sup> | 155.3(5)   | O(9) <sup>#9</sup> -K(1)-O(6) <sup>#5</sup> | 82.83(10)  |
| O(9) <sup>#4</sup> -Li(1)-O(2) <sup>#3</sup> | 85.6(4)    | O(9) <sup>#8</sup> -K(1)-O(6) <sup>#6</sup> | 81.48(10)  |
| O(9) <sup>#4</sup> -Li(1)-O(4) <sup>#3</sup> | 120.6(6)   | O(9) <sup>#8</sup> -K(1)-O(6) <sup>#5</sup> | 148.28(11) |
| O(9) <sup>#4</sup> -Li(1)-O(5) <sup>#5</sup> | 104.4(5)   | O(9) <sup>#9</sup> -K(1)-O(6) <sup>#6</sup> | 47.52(10)  |
| O(1)-K(1)-O(2) <sup>#6</sup>                 | 138.95(12) | O(9) <sup>#8</sup> -K(1)-O(7) <sup>#8</sup> | 66.13(10)  |
| O(1)-K(1)-O(3) <sup>#7</sup>                 | 172.07(13) | O(9) <sup>#9</sup> -K(1)-O(7) <sup>#8</sup> | 162.43(11) |
| O(1)-K(1)-O(5) <sup>#5</sup>                 | 66.30(10)  | O(9) <sup>#9</sup> -K(1)-O(8) <sup>#5</sup> | 117.76(11) |
| O(1)-K(1)-O(6) <sup>#6</sup>                 | 92.78(11)  | O(9) <sup>#8</sup> -K(1)-O(8) <sup>#5</sup> | 113.62(11) |
| O(1)-K(1)-O(6) <sup>#5</sup>                 | 111.72(12) | O(9) <sup>#8</sup> -K(1)-O(9) <sup>#9</sup> | 126.70(9)  |
| O(1)-K(1)-O(7) <sup>#8</sup>                 | 111.99(12) | O(2)-B(1)-O(3)                              | 109.9(4)   |
| O(1)-K(1)-O(8) <sup>#5</sup>                 | 87.77(12)  | O(2)-B(1)-O(4)                              | 104.0(4)   |
| O(1)-K(1)-O(9) <sup>#8</sup>                 | 86.16(12)  | O(4)-B(1)-O(3)                              | 109.4(4)   |
| O(1)-K(1)-O(9) <sup>#9</sup>                 | 82.63(12)  | O(5)-B(1)-O(2)                              | 111.8(4)   |
| O(2) <sup>#6</sup> -K(1)-O(6) <sup>#5</sup>  | 107.37(10) | O(5)-B(1)-O(3)                              | 110.9(4)   |

---

|                                             |            |                                               |            |
|---------------------------------------------|------------|-----------------------------------------------|------------|
| O(2) <sup>#6</sup> -K(1)-O(6) <sup>#6</sup> | 55.20(10)  | O(5)-B(1)-O(4)                                | 110.5(4)   |
| O(3) <sup>#7</sup> -K(1)-O(2) <sup>#6</sup> | 48.54(10)  | O(5)-B(2)-O(6)                                | 109.1(4)   |
| O(3) <sup>#7</sup> -K(1)-O(5) <sup>#5</sup> | 107.82(11) | O(5)-B(2)-O(7)                                | 111.8(5)   |
| O(3) <sup>#7</sup> -K(1)-O(6) <sup>#6</sup> | 94.88(11)  | O(5)-B(2)-O(8)                                | 109.7(4)   |
| O(3) <sup>#7</sup> -K(1)-O(6) <sup>#5</sup> | 62.25(11)  | O(7)-B(2)-O(6)                                | 109.6(4)   |
| O(3) <sup>#7</sup> -K(1)-O(7) <sup>#8</sup> | 63.20(11)  | O(7)-B(2)-O(8)                                | 110.2(4)   |
| O(3) <sup>#7</sup> -K(1)-O(8) <sup>#5</sup> | 84.30(11)  | O(8)-B(2)-O(6)                                | 106.3(4)   |
| O(3) <sup>#7</sup> -K(1)-O(9) <sup>#8</sup> | 96.98(11)  | O(1)-P(1)-O(2)                                | 112.4(2)   |
| O(3) <sup>#7</sup> -K(1)-O(9) <sup>#9</sup> | 101.10(11) | O(1)-P(1)-O(3) <sup>#4</sup>                  | 112.0(2)   |
| O(5) <sup>#5</sup> -K(1)-O(2) <sup>#6</sup> | 149.10(10) | O(1)-P(1)-O(7) <sup>#4</sup>                  | 113.4(2)   |
| O(5) <sup>#5</sup> -K(1)-O(6) <sup>#5</sup> | 45.58(10)  | O(2)-P(1)-O(3) <sup>#4</sup>                  | 102.4(2)   |
| O(5) <sup>#5</sup> -K(1)-O(6) <sup>#6</sup> | 120.15(10) | O(2)-P(1)-O(7) <sup>#4</sup>                  | 108.9(2)   |
| O(5) <sup>#5</sup> -K(1)-O(7) <sup>#8</sup> | 102.59(11) | O(7) <sup>#4</sup> -P(1)-O(3) <sup>#4</sup>   | 107.0(2)   |
| O(5) <sup>#5</sup> -K(1)-O(8) <sup>#5</sup> | 46.80(10)  | O(6) <sup>#13</sup> -P(2)-O(4) <sup>#14</sup> | 109.22(19) |
| O(6) <sup>#5</sup> -K(1)-O(6) <sup>#6</sup> | 121.61(10) | O(6) <sup>#13</sup> -P(2)-O(8)                | 107.0(2)   |
| O(7) <sup>#8</sup> -K(1)-O(2) <sup>#6</sup> | 84.64(11)  | O(8)-P(2)-O(4) <sup>#14</sup>                 | 104.8(2)   |
| O(7) <sup>#8</sup> -K(1)-O(6) <sup>#6</sup> | 136.64(11) | O(9)-P(2)-O(4) <sup>#14</sup>                 | 110.3(2)   |
| O(7) <sup>#8</sup> -K(1)-O(6) <sup>#5</sup> | 82.62(10)  | O(9)-P(2)-O(6) <sup>#13</sup>                 | 110.3(2)   |
| O(8) <sup>#5</sup> -K(1)-O(2) <sup>#6</sup> | 130.13(11) | O(9)-P(2)-O(8)                                | 114.8(2)   |
| B(1)-O(3)                                   | 1.491(7)   |                                               |            |

Symmetry transformations used to generate equivalent atoms:

|                         |                         |                        |
|-------------------------|-------------------------|------------------------|
| #1 -x+2, y-1/2, -z+1/2  | #2 -x+3/2, -y+1, z-1/2  | #3 -x+1, y-1/2, -z+1/2 |
| #4 -x+1, y+1/2, -z+1/2  | #5 x+1, y, z            | #6 x+1/2, -y+3/2, -z+1 |
| #7 -x+3/2, -y+1, z+1/2  | #8 x+1/2, -y+1/2, -z+1  | #9 x+1, y+1, z         |
| #10 x-1, y, z           | #11 x-1/2, -y+3/2, -z+1 | #12 x-1, y-1, z        |
| #13 x-1/2, -y+1/2, -z+1 | #14 -x, y-1/2, -z+1/2   | #15 -x, y+1/2, -z+1/2  |

LiNaB<sub>2</sub>P<sub>2</sub>O<sub>8</sub>(OH)<sub>2</sub>·H<sub>2</sub>O

|                          |          |                          |          |
|--------------------------|----------|--------------------------|----------|
| Li(1)-O(1) <sup>#3</sup> | 1.930(6) | Na(1)-O(6)               | 2.464(3) |
| Li(1)-O(1) <sup>#4</sup> | 1.930(6) | Na(1)-O(6) <sup>#5</sup> | 2.464(3) |
| Li(1)-O(5)               | 1.944(7) | B(1)-O(1)                | 1.426(5) |
| Li(1)-O(5) <sup>#2</sup> | 1.943(7) | B(1)-O(2)                | 1.494(5) |
| Na(1)-O(3) <sup>#2</sup> | 2.907(3) | B(1)-O(3)                | 1.501(6) |
| Na(1)-O(3) <sup>#5</sup> | 2.907(3) | B(1)-O(4)                | 1.468(5) |
| Na(1)-O(4) <sup>#5</sup> | 2.895(3) | P(1)-O(2) <sup>#5</sup>  | 1.546(3) |

|                                              |            |                                              |            |
|----------------------------------------------|------------|----------------------------------------------|------------|
| Na(1)-O(4) <sup>#2</sup>                     | 2.895(3)   | P(1)-O(3) <sup>#3</sup>                      | 1.545(3)   |
| Na(1)-O(5) <sup>#6</sup>                     | 2.461(4)   | P(1)-O(4)                                    | 1.543(3)   |
| Na(1)-O(5)                                   | 2.461(4)   | P(1)-O(5)                                    | 1.497(3)   |
| O(1) <sup>#4</sup> -Li(1)-O(1) <sup>#3</sup> | 127.3(6)   | O(5)-Na(1)-O(6) <sup>#5</sup>                | 138.42(11) |
| O(1) <sup>#3</sup> -Li(1)-O(5)               | 98.00(13)  | O(5) <sup>#6</sup> -Na(1)-O(6)               | 138.42(11) |
| O(1) <sup>#4</sup> -Li(1)-O(5)               | 109.53(13) | O(6)-Na(1)-O(3) <sup>#5</sup>                | 76.43(9)   |
| O(1) <sup>#3</sup> -Li(1)-O(5) <sup>#2</sup> | 109.53(13) | O(6)-Na(1)-O(3) <sup>#2</sup>                | 81.17(9)   |
| O(1) <sup>#4</sup> -Li(1)-O(5) <sup>#2</sup> | 98.00(13)  | O(6) <sup>#5</sup> -Na(1)-O(3) <sup>#5</sup> | 81.17(9)   |
| O(5) <sup>#2</sup> -Li(1)-O(5)               | 115.5(6)   | O(6) <sup>#5</sup> -Na(1)-O(3) <sup>#2</sup> | 76.43(9)   |
| O(3) <sup>#5</sup> -Na(1)-O(3) <sup>#2</sup> | 133.84(18) | O(6) <sup>#5</sup> -Na(1)-O(4) <sup>#5</sup> | 70.01(8)   |
| O(4) <sup>#5</sup> -Na(1)-O(3) <sup>#5</sup> | 47.18(8)   | O(6)-Na(1)-O(4) <sup>#5</sup>                | 121.84(7)  |
| O(4) <sup>#5</sup> -Na(1)-O(3) <sup>#2</sup> | 145.77(9)  | O(6)-Na(1)-O(4) <sup>#2</sup>                | 70.01(8)   |
| O(4) <sup>#2</sup> -Na(1)-O(3) <sup>#5</sup> | 145.77(9)  | O(6) <sup>#5</sup> -Na(1)-O(4) <sup>#2</sup> | 121.84(7)  |
| O(4) <sup>#2</sup> -Na(1)-O(3) <sup>#2</sup> | 47.18(8)   | O(6) <sup>#5</sup> -Na(1)-O(6)               | 120.7(3)   |
| O(4) <sup>#2</sup> -Na(1)-O(4) <sup>#5</sup> | 158.38(18) | O(1)-B(1)-O(2)                               | 104.8(3)   |
| O(5)-Na(1)-O(3) <sup>#5</sup>                | 78.38(9)   | O(1)-B(1)-O(3)                               | 114.4(4)   |
| O(5)-Na(1)-O(3) <sup>#2</sup>                | 141.24(12) | O(1)-B(1)-O(4)                               | 114.9(4)   |
| O(5) <sup>#6</sup> -Na(1)-O(3) <sup>#2</sup> | 78.38(9)   | O(2)-B(1)-O(3)                               | 108.1(3)   |
| O(5) <sup>#6</sup> -Na(1)-O(3) <sup>#5</sup> | 141.24(12) | O(4)-B(1)-O(2)                               | 111.7(4)   |
| O(5) <sup>#6</sup> -Na(1)-O(4) <sup>#2</sup> | 69.50(9)   | O(4)-B(1)-O(3)                               | 102.9(3)   |
| O(5)-Na(1)-O(4) <sup>#2</sup>                | 94.22(11)  | O(3) <sup>#3</sup> -P(1)-O(2) <sup>#5</sup>  | 102.83(17) |
| O(5)-Na(1)-O(4) <sup>#5</sup>                | 69.50(9)   | O(4)-P(1)-O(2) <sup>#5</sup>                 | 110.11(17) |
| O(5) <sup>#6</sup> -Na(1)-O(4) <sup>#5</sup> | 94.22(11)  | O(4)-P(1)-O(3) <sup>#3</sup>                 | 108.97(15) |
| O(5)-Na(1)-O(5) <sup>#6</sup>                | 84.95(18)  | O(5)-P(1)-O(2) <sup>#6</sup>                 | 112.49(15) |
| O(5)-Na(1)-O(6)                              | 88.97(12)  | O(5)-P(1)-O(3) <sup>#3</sup>                 | 113.76(19) |
| O(5) <sup>#6</sup> -Na(1)-O(6) <sup>#5</sup> | 88.97(12)  | O(5)-P(1)-O(4)                               | 108.54(16) |

Symmetry transformations used to generate equivalent atoms:

#1 x, y, z-1    #2 -x+1, y, -z+1    #3 -x+1/2, y+1/2, -z

#4 x+1/2, y+1/2, z+1    #5 x, y, z+1    #6 -x+1, y, -z+2

#7 x-1/2, y-1/2, z-1    #8 -x+1/2, y-1/2, -z

**Table S4.** Borophosphates with B:P = 1:1.

| No | Compounds                               | Space group | FBB                    | Architectural feature    | Dimensions | Ref. |
|----|-----------------------------------------|-------------|------------------------|--------------------------|------------|------|
| 1  | $K_4B_2P_2O_9F_2$                       | $P2_1/c$    | $[B_2P_2O_9F_2]$       | $4\Box: <3\Box>=<3\Box>$ | 0D         | 8    |
| 2  | $Mg(B(PO_4)(OH)_2)(H_2O)_2$             | $R\bar{3}c$ | $[BPO_5(OH)_2]$        | $6\Box: <6\Box>$         | 0D         | 9    |
| 3  | $KNi_5(P_6B_6O_{23}(OH)_{13})$          | $Pa\bar{3}$ | $[BPO_4(OH)_3]$        | $12\Box: <12\Box>$       | 0D         | 10   |
| 4  | $CaBPO_5$                               | $P3_121$    | $[B_2P_2O_{12}]$       | $4\Box: <3\Box>\Box$     | 1D         | 11   |
| 5  | $SrBPO_5$                               | $P3_121$    | $[B_2P_2O_{12}]$       | $4\Box: <3\Box>\Box$     | 1D         | 11   |
| 6  | $BaBPO_5$                               | $P3_121$    | $[B_2P_2O_{12}]$       | $4\Box: <3\Box>\Box$     | 1D         | 12   |
| 7  | $PbBPO_5$                               | $P3_121$    | $[B_2P_2O_{12}]$       | $4\Box: <3\Box>\Box$     | 1D         | 13   |
| 8  | $Al(B_2P_2O_7(OH)_5)(H_2O)$             | $C2/c$      | $[BPO_6(OH)]$          | $2\Box: 2\Box$           | 1D         | 14   |
| 9  | $Fe(B_2P_2O_7(OH)_5)$                   | $C2/c$      | $[BPO_6(OH)]$          | $2\Box: 2\Box$           | 1D         | 15   |
| 10 | $Mg(BPO_4(OH)_2)$                       | $P3_121$    | $[BPO_5(OH)_2]$        | $2\Box: 2\Box$           | 1D         | 16   |
| 11 | $Mg_3B_2(OH)_6(PO_4)_2(H_2O)_6$         | $P\bar{1}$  | $[BPO_4(OH)_3]$        | $2\Box: 2\Box$           | 1D         | 17   |
| 12 | $Ni(BPO_4(OH)_2)$                       | $P3_121$    | $[BPO_5(OH)_2]$        | $2\Box: 2\Box$           | 1D         | 16   |
| 13 | $Co(BPO_4(OH)_2)$                       | $P3_121$    | $[BPO_5(OH)_2]$        | $2\Box: 2\Box$           | 1D         | 18   |
| 14 | $Mn(BPO_4(OH)_2)$                       | $P3_121$    | $[BPO_5(OH)_2]$        | $2\Box: 2\Box$           | 1D         | 18   |
| 15 | $Fe(BPO_4(OH)_2)$                       | $P3_121$    | $[BPO_5(OH)_2]$        | $2\Box: 2\Box$           | 1D         | 18   |
| 16 | $ZnBPO_4(OH)_2$                         | $Pbcn$      | $[BPO_5(OH)_2]$        | $2\Box: 2\Box$           | 1D         | 19   |
| 17 | $BaB_2P_2O_8F_2$                        | $P2_1/c$    | $[B_2P_2O_{11}F_2]$    | $6\Box: <6\Box>$         | 2D         | 20   |
| 18 | $KBPO_4F$                               | $Cc$        | $[BPO_6F]$             | $6\Box: <6\Box>$         | 2D         | 21   |
| 19 | $Cu(H_2O)_2(B_2P_2O_8(OH)_2)$           | $Pbca$      | $[BPO_6(OH)]$          | $6\Box: <6\Box>$         | 2D         | 22   |
| 20 | $Mg(H_2O)_2[B_2P_2O_8(OH)_2]\cdot H_2O$ | $P2_1/c$    | $[B_2P_2O_{10}(OH)_2]$ | $6\Box: <6\Box>$         | 2D         | 23   |

|    |                                                                                      |                                                       |                                                      |               |    |           |
|----|--------------------------------------------------------------------------------------|-------------------------------------------------------|------------------------------------------------------|---------------|----|-----------|
| 21 | LiNaB <sub>2</sub> P <sub>2</sub> O <sub>8</sub> (OH) <sub>2</sub> ·H <sub>2</sub> O | <i>C</i> 2                                            | [BPO <sub>6</sub> (OH)]                              | 6□: <6□>      | 2D | This work |
| 22 | K <sub>2</sub> B <sub>2</sub> P <sub>2</sub> O <sub>9</sub>                          | <i>P</i> 2 <sub>1</sub> 2 <sub>1</sub> 2 <sub>1</sub> | [B <sub>2</sub> P <sub>2</sub> O <sub>11</sub> ]     | 4□: <3□>≡<3□> | 3D | 24        |
| 23 | RbBPO <sub>4</sub> F                                                                 | <i>P</i> 2 <sub>1</sub> 3                             | [BPO <sub>6</sub> F]                                 | 2□: 2□        | 3D | 25        |
| 24 | CsBPO <sub>4</sub> F                                                                 | <i>P</i> 2 <sub>1</sub> 3                             | [BPO <sub>6</sub> F]                                 | 2□: 2□        | 3D | 25        |
| 25 | NH <sub>4</sub> BPO <sub>4</sub> F                                                   | <i>P</i> 2 <sub>1</sub> 3                             | [BPO <sub>6</sub> F]                                 | 2□: 2□        | 3D | 26        |
| 26 | RbB <sub>2</sub> P <sub>2</sub> O <sub>8</sub> OH                                    | <i>P</i> 2 <sub>1</sub> / <i>c</i>                    | [B <sub>2</sub> P <sub>2</sub> O <sub>11</sub> (OH)] | 4□: <3□>□     | 3D | 27        |
| 27 | CsB <sub>2</sub> P <sub>2</sub> O <sub>8</sub> OH                                    | <i>P</i> 2 <sub>1</sub> / <i>c</i>                    | [B <sub>2</sub> P <sub>2</sub> O <sub>11</sub> (OH)] | 4□: <3□>□     | 3D | 27        |
| 28 | LiNH <sub>4</sub> B <sub>2</sub> P <sub>2</sub> O <sub>9</sub>                       | <i>P</i> 2 <sub>1</sub> 2 <sub>1</sub> 2 <sub>1</sub> | [B <sub>2</sub> P <sub>2</sub> O <sub>12</sub> ]     | 4□: <3□>□     | 3D | This work |
| 29 | LiKB <sub>2</sub> P <sub>2</sub> O <sub>9</sub>                                      | <i>P</i> 2 <sub>1</sub> 2 <sub>1</sub> 2 <sub>1</sub> | [B <sub>2</sub> P <sub>2</sub> O <sub>12</sub> ]     | 4□: <3□>□     | 3D | This work |

□: tetrahedron; <...>: enclosed ring motifs; (–, =, ≡): the number of common polyhedron.

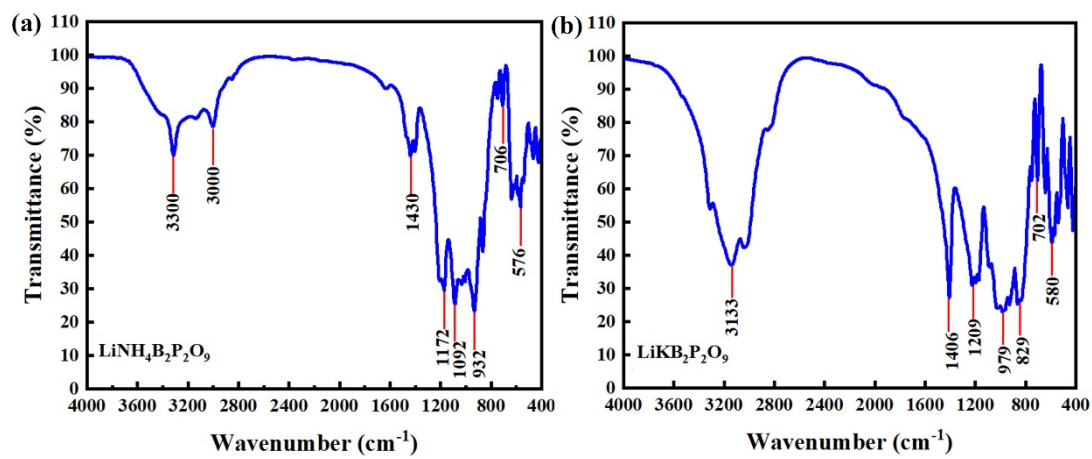

**Figure S1.** The IR of LiAB<sub>2</sub>P<sub>2</sub>O<sub>9</sub> (A = NH<sub>4</sub>, K)

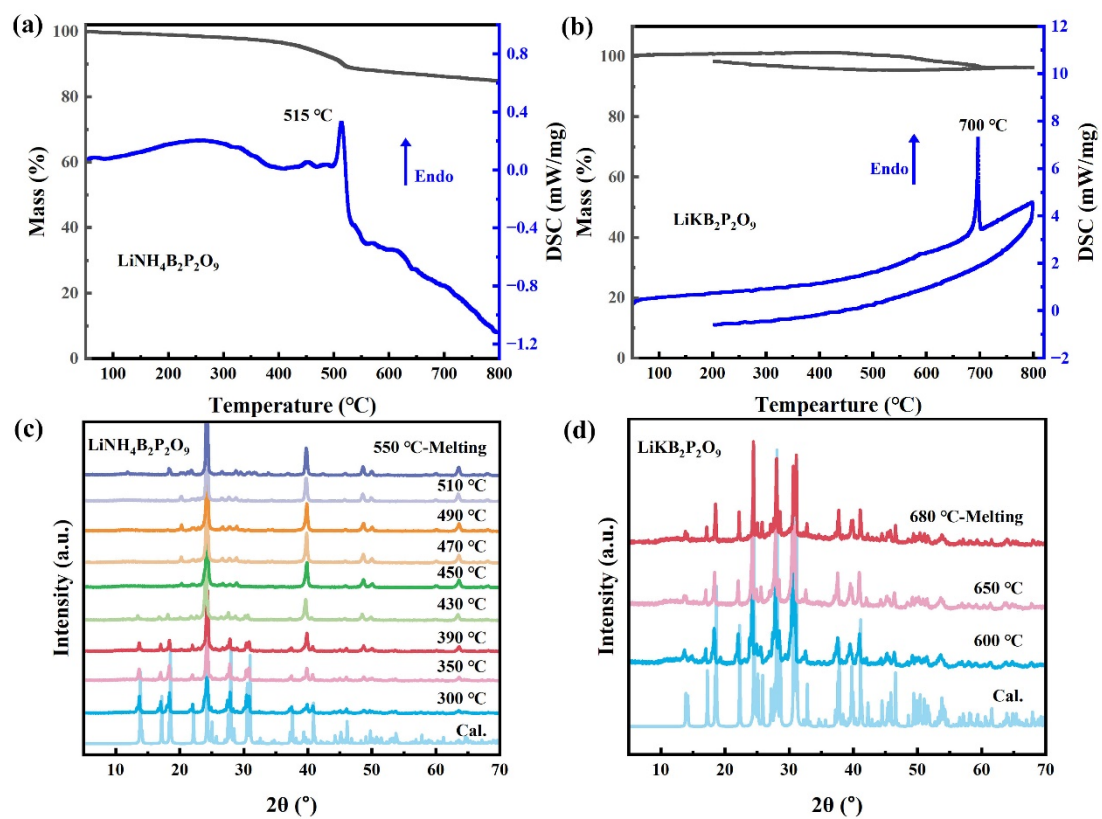

**Figure S2.** TG-DSC curves and calcinated XRD of  $\text{LiAB}_2\text{P}_2\text{O}_9$  ( $A=\text{NH}_4, \text{K}$ ).

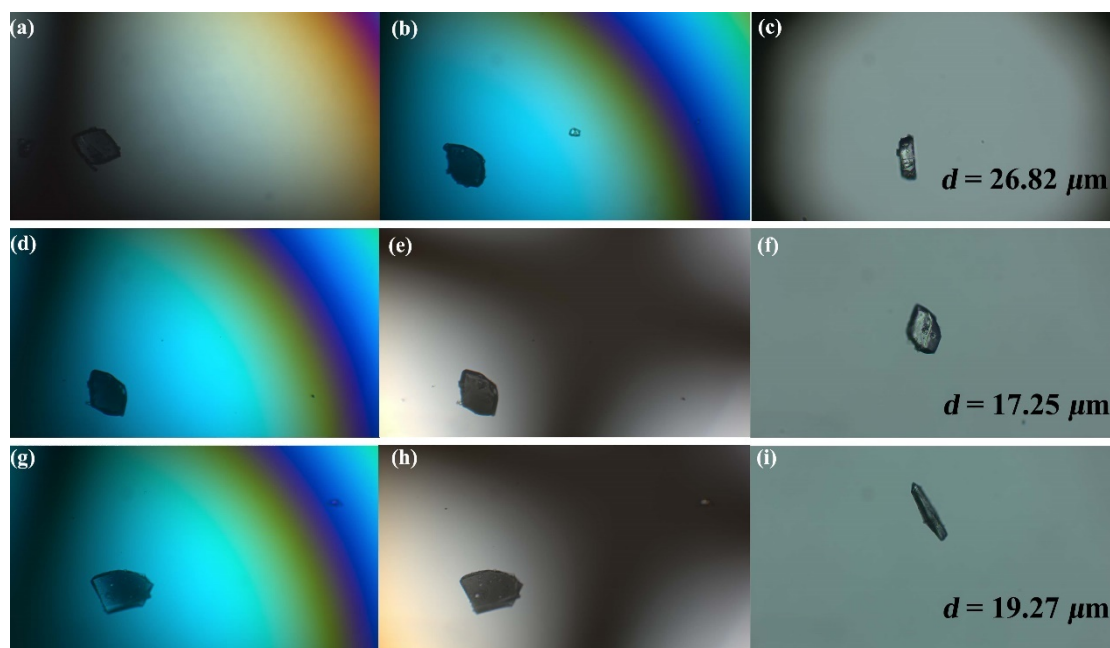

**Figure S3.** Birefringence measurement of  $\text{LiNH}_4\text{B}_2\text{P}_2\text{O}_9$  (a-c),  $\text{LiKB}_2\text{P}_2\text{O}_9$  (d-f), and  $\text{LiNaB}_2\text{P}_2\text{O}_8(\text{OH})_2 \cdot \text{H}_2\text{O}$  (g-i).



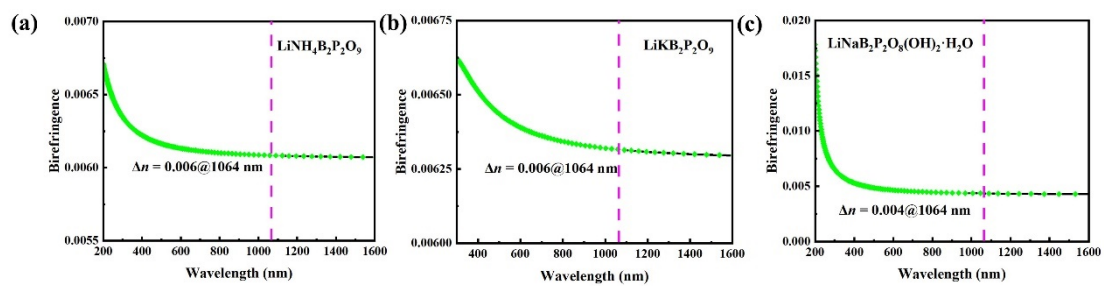

**Figure S4.** The calculated birefringence of  $\text{LiNH}_4\text{B}_2\text{P}_2\text{O}_9$  (a),  $\text{LiKB}_2\text{P}_2\text{O}_9$  (b), and  $\text{LiNaB}_2\text{P}_2\text{O}_8(\text{OH})_2 \cdot \text{H}_2\text{O}$  (c).

## References

- 1 SAINT, 2008, WI.
- 2 G. M. Sheldrick, *Acta Crystallogr. A*, 2008, **64**, 112-122.
- 3 A. L. Spek, *J. Appl. Crystallogr.*, 2003, **36**, 7-13.
- 4 S. J. Clark, M. D. Segallii and C. J. PickardIii, *Z. Krist-crystallogr. Mater.*, 2005, **220**, 567-570.
- 5 A. M. Rappe, K. M. Rabe, E. Kaxiras and J. D. Joannopoulos, *Phys. Rev. B*, 1990, **41**, 1227-1230.
- 6 J. P. Perdew, K. Burke and M. Ernzerhof, *Phys. Rev. Lett.*, 1996, **77**, 3865.
- 7 A. V. Krukau, O. A. Vydrov, A. F. Izmaylov and G. E. Scuseria, *J. Chem. Phys.*, 2006, **125**, 224106.
- 8 R. N. Zhang, S. R. Guo, X. P. Wang, R. Yang, Z. Chen, W. Y. Zhang, F. F. Zhang, Z. Y. Guo, S. J. Han and Z. H. Yang, *Dalton Trans.*, 2022, **51**, 2840-2845.
- 9 H. Z. Shi, Y. K. Shan, M. Y. He and Y. Y. Liu, *Z. Kristallogr. New Crystallogr. Struct.*, 2003, **218**, 21-22.
- 10 O. V. Yakubovich, I. M. Steele, W. Massa and O. V. Dimitrova, *Acta Crystallogr. C*, 2009, **65**, i94-i98.
- 11 R. Kniep, G. Gözel, B. Eisenmann, C. Röhr, M. Asbrand and M. Kizilyalli, *Angew. Chem.Int. Ed.*, 1994, **33**, 749-751.
- 12 Y. Shi, J. K. Liang, H. Zhang, Q. L. Liu, X. L. Chen, J. L. Yang, W. D. Zhuang and G. H. Rao, *J. Solid State Chem.*, 1998, **135**, 43-51.
- 13 A. B. Ali, E. Antic-Fidancev, B. Viana, P. Aschehoug, M. Taibi, J. Aride and A. Boukhari, *J. Phys-Condens Mat.*, 2001, **13**, 9663.
- 14 R. Kniep, D. Koch and H. Borrmann, *Z. Kristallogr. New Crystallogr. Struct.*, 2002, **217**, 187-188.
- 15 I. Boy, C. Hauf and R. Kniep, *Z. Naturforsch. B*, 1998, **53**, 631-633.
- 16 T. Yang, J. Ju, F. Liao, J. Sasaki, N. Toyota and J. Lin, *J. Solid State Chem.*, 2008, **181**, 1110-1115.
- 17 P. K. Sen Gupta, G. H. Swihart, R. Dimitrijevic and M. B. Hossain, *Am. Mineral.*, 1991, **76**, 1400-1407.
- 18 Y. X. Huang, B. Ewald, W. Schnelle, Y. Prots and R. Kniep, *Inorg. Chem.*, 2006, **45**, 7578-7580.
- 19 Y. X. Huang, Y. Prots and R. Kniep, *Chem. Eur. J.*, 2008, **14**, 1757-1761.

- 20 J. B. Fan, M. F. Wu, B. L. Cheng and J. Han, *Inorg. Chem.*, 2023, **62**, 664-669.
- 21 J. H. Jiang, L. C. Zhang, Y. X. Huang, Z. M. Sun, Y. M. Pan and J. X. Mi, *Dalton Trans.*, 2017, **46**, 1677-1683.
- 22 H. Z. Shi, M. Li, H. J. Tangbo, A. G. Kong, B. Chen and Y. K. Shan, *Inorg. Chem.*, 2005, **44**, 8179-8181.
- 23 B. Ewald, Y. Öztan, Y. Prots and R. Kniep, *Z. Anorg. Allg. Chem.*, 2005, **631**, 1615-1621.
- 24 X. Yang, W. B. Zhang, X. T. Pan, X. L. Hou and S. J. Han, *Inorg. Chem.*, 2023, **62**, 20430-20438.
- 25 Q. R. Ding, S. G. Zhao, L. N. Li, Y. G. Shen, P. Shan, Z. Y. Wu, X. F. Li, Y. Q. Li, S. Liu and J. H. Luo, *Inorg. Chem.*, 2019, **58**, 1733-1737.
- 26 M. R. Li, W. Liu, M. H. Ge, H. H. Chen, X. X. Yang and J. T. Zhao, *Chem. Commun.*, 2004, 1272-1273.
- 27 C. Häuf and R. Kniep, *Z. Naturforsch. B*, 1997, **52**, 1432-1435.
